# Supplementary material for: Facilitators and barriers of the implementation of point-of-care devices for cardiometabolic diseases: a scoping review
Source: Springer Nature journal article supplement (doi:10.1186/s12913-023-09419-2), 2023-04-28
Supplement: MOESM2 [file 25296686]

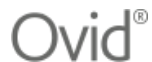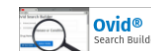

[Search](#) [Journals](#) [Books](#) [Multimedia](#) [My Workspace](#) [Links](#) [What's New](#)

▼ **Search History** (48)

[View Saved](#)

| <input type="checkbox"/> | # ▲ | Searches                                                 | Results | Type     | Actions                                                | Annotations |
|--------------------------|-----|----------------------------------------------------------|---------|----------|--------------------------------------------------------|-------------|
| <input type="checkbox"/> | 1   | exp point-of-care systems/                               | 21807   | Advanced | <a href="#">Display Results</a>   <a href="#">More</a> | Contract    |
| <input type="checkbox"/> | 2   | point of care system.tw,kf.                              | 487     | Advanced | <a href="#">Display Results</a>   <a href="#">More</a> |             |
| <input type="checkbox"/> | 3   | point of care.tw,kf.                                     | 72245   | Advanced | <a href="#">Display Results</a>   <a href="#">More</a> |             |
| <input type="checkbox"/> | 4   | point-of-care.tw,kf.                                     | 72245   | Advanced | <a href="#">Display Results</a>   <a href="#">More</a> |             |
| <input type="checkbox"/> | 5   | point of care technology.tw,kf.                          | 452     | Advanced | <a href="#">Display Results</a>   <a href="#">More</a> |             |
| <input type="checkbox"/> | 6   | point of care testing.tw,kf.                             | 12265   | Advanced | <a href="#">Display Results</a>   <a href="#">More</a> |             |
| <input type="checkbox"/> | 7   | point-of-care testing.tw,kf.                             | 12265   | Advanced | <a href="#">Display Results</a>   <a href="#">More</a> |             |
| <input type="checkbox"/> | 8   | POC*.tw,kf.                                              | 195893  | Advanced | <a href="#">Display Results</a>   <a href="#">More</a> |             |
| <input type="checkbox"/> | 9   | laboratory-independent.tw,kf.                            | 99      | Advanced | <a href="#">Display Results</a>   <a href="#">More</a> |             |
| <input type="checkbox"/> | 10  | rapid testing.tw,kf.                                     | 4224    | Advanced | <a href="#">Display Results</a>   <a href="#">More</a> |             |
| <input type="checkbox"/> | 11  | near patient testing.tw,kf.                              | 743     | Advanced | <a href="#">Display Results</a>   <a href="#">More</a> |             |
| <input type="checkbox"/> | 12  | 1 or 2 or 3 or 4 or 5 or 6 or 7 or 8 or 9 or 10 or 11    | 261202  | Advanced | <a href="#">Display Results</a>   <a href="#">More</a> |             |
| <input type="checkbox"/> | 13  | primary care.tw,kf.                                      | 339206  | Advanced | <a href="#">Display Results</a>   <a href="#">More</a> |             |
| <input type="checkbox"/> | 14  | primary health care.tw,kf.                               | 90392   | Advanced | <a href="#">Display Results</a>   <a href="#">More</a> |             |
| <input type="checkbox"/> | 15  | PHC.tw,kf.                                               | 15593   | Advanced | <a href="#">Display Results</a>   <a href="#">More</a> |             |
| <input type="checkbox"/> | 16  | health care.tw,kf.                                       | 1153337 | Advanced | <a href="#">Display Results</a>   <a href="#">More</a> |             |
| <input type="checkbox"/> | 17  | healthcare.tw,kf.                                        | 811687  | Advanced | <a href="#">Display Results</a>   <a href="#">More</a> |             |
| <input type="checkbox"/> | 18  | general practice.tw,kf.                                  | 94629   | Advanced | <a href="#">Display Results</a>   <a href="#">More</a> |             |
| <input type="checkbox"/> | 19  | health center.tw,kf.                                     | 34003   | Advanced | <a href="#">Display Results</a>   <a href="#">More</a> |             |
| <input type="checkbox"/> | 20  | health centre.tw,kf.                                     | 16975   | Advanced | <a href="#">Display Results</a>   <a href="#">More</a> |             |
| <input type="checkbox"/> | 21  | health service.tw,kf.                                    | 136550  | Advanced | <a href="#">Display Results</a>   <a href="#">More</a> |             |
| <input type="checkbox"/> | 22  | social care.tw,kf.                                       | 19271   | Advanced | <a href="#">Display Results</a>   <a href="#">More</a> |             |
| <input type="checkbox"/> | 23  | 13 or 14 or 15 or 16 or 17 or 18 or 19 or 20 or 21 or 22 | 2285488 | Advanced | <a href="#">Display Results</a>   <a href="#">More</a> |             |

|                          |    |                                                                |         |          |                                                        |  |
|--------------------------|----|----------------------------------------------------------------|---------|----------|--------------------------------------------------------|--|
| <input type="checkbox"/> | 24 | exp process assessment, health care/                           | 3762084 | Advanced | <a href="#">Display Results</a>   <a href="#">More</a> |  |
| <input type="checkbox"/> | 25 | process assessment, health care.tw,kf.                         | 634     | Advanced | <a href="#">Display Results</a>   <a href="#">More</a> |  |
| <input type="checkbox"/> | 26 | implementation.tw,kf.                                          | 787730  | Advanced | <a href="#">Display Results</a>   <a href="#">More</a> |  |
| <input type="checkbox"/> | 27 | implementing.tw,kf.                                            | 221637  | Advanced | <a href="#">Display Results</a>   <a href="#">More</a> |  |
| <input type="checkbox"/> | 28 | exp delivery of health care/                                   | 5084606 | Advanced | <a href="#">Display Results</a>   <a href="#">More</a> |  |
| <input type="checkbox"/> | 29 | delivery of health care.tw,kf.                                 | 18515   | Advanced | <a href="#">Display Results</a>   <a href="#">More</a> |  |
| <input type="checkbox"/> | 30 | delivery of healthcare.tw,kf.                                  | 2836    | Advanced | <a href="#">Display Results</a>   <a href="#">More</a> |  |
| <input type="checkbox"/> | 31 | health* delivery.tw,kf.                                        | 18883   | Advanced | <a href="#">Display Results</a>   <a href="#">More</a> |  |
| <input type="checkbox"/> | 32 | process evaluation.tw,kf.                                      | 11642   | Advanced | <a href="#">Display Results</a>   <a href="#">More</a> |  |
| <input type="checkbox"/> | 33 | quality improvement.tw,kf.                                     | 126926  | Advanced | <a href="#">Display Results</a>   <a href="#">More</a> |  |
| <input type="checkbox"/> | 34 | 24 or 25 or 26 or 27 or 28 or 29 or 30 or 31 or 32 or 33       | 8462372 | Advanced | <a href="#">Display Results</a>   <a href="#">More</a> |  |
| <input type="checkbox"/> | 35 | facilita*.tw,kf.                                               | 1475293 | Advanced | <a href="#">Display Results</a>   <a href="#">More</a> |  |
| <input type="checkbox"/> | 36 | support*.tw,kf.                                                | 4393519 | Advanced | <a href="#">Display Results</a>   <a href="#">More</a> |  |
| <input type="checkbox"/> | 37 | assist*.tw,kf.                                                 | 1179898 | Advanced | <a href="#">Display Results</a>   <a href="#">More</a> |  |
| <input type="checkbox"/> | 38 | enabl*.tw,kf.                                                  | 1249253 | Advanced | <a href="#">Display Results</a>   <a href="#">More</a> |  |
| <input type="checkbox"/> | 39 | imped*.tw,kf.                                                  | 258945  | Advanced | <a href="#">Display Results</a>   <a href="#">More</a> |  |
| <input type="checkbox"/> | 40 | obstruct*.tw,kf.                                               | 819711  | Advanced | <a href="#">Display Results</a>   <a href="#">More</a> |  |
| <input type="checkbox"/> | 41 | hinder*.tw,kf.                                                 | 167736  | Advanced | <a href="#">Display Results</a>   <a href="#">More</a> |  |
| <input type="checkbox"/> | 42 | halt*.tw,kf.                                                   | 48768   | Advanced | <a href="#">Display Results</a>   <a href="#">More</a> |  |
| <input type="checkbox"/> | 43 | prohibit*.tw,kf.                                               | 66589   | Advanced | <a href="#">Display Results</a>   <a href="#">More</a> |  |
| <input type="checkbox"/> | 44 | barrier*.tw,kf.                                                | 878049  | Advanced | <a href="#">Display Results</a>   <a href="#">More</a> |  |
| <input type="checkbox"/> | 45 | lesson*.tw,kf.                                                 | 189706  | Advanced | <a href="#">Display Results</a>   <a href="#">More</a> |  |
| <input type="checkbox"/> | 46 | 35 or 36 or 37 or 38 or 39 or 40 or 41 or 42 or 43 or 44 or 45 | 9519132 | Advanced | <a href="#">Display Results</a>   <a href="#">More</a> |  |
| <input type="checkbox"/> | 47 | 12 and 23 and 34 and 46                                        | 5986    | Advanced | <a href="#">Display Results</a>   <a href="#">More</a> |  |
| <input type="checkbox"/> | 48 | remove duplicates from 47                                      | 4268    | Advanced | <a href="#">Display Results</a>   <a href="#">More</a> |  |

Combine with:

[Deduplicate](#)

[View Saved](#)
